# Supplementary material for: How Do Students Critically Evaluate Outdated Language That Relates to Gender in Biology?
Source: Atypon-hosted journal article supplement (doi:10.1187/cbe.23-07-0125), 2024-05-10
Supplement: combinedsupmats.pdf [file combinedsupmats.pdf]

# Supplemental Material

CBE—Life Sciences Education

Dunk *et al.*

## Supplemental Material

Table S1. List of gender- associated terms found in textbook questions related to meiosis and genetics.

| Term         | Count         |
|--------------|---------------|
| Boy          | III           |
| Girl         | III           |
| Son          | IIII II       |
| Daughter     | IIII III      |
| Mother       | IIII I        |
| Father       | IIII II       |
| Sister       | I             |
| Brother      | II            |
| Grandmother  | I             |
| Husband      | II            |
| Wife         | I             |
| Man/ Men     | IIII IIII II  |
| Woman/ Women | IIII IIII III |
